# Supplementary material for: ﻿Phylogenomic analysis of 997 nuclear genes reveals the need for extensive generic re-delimitation in Caesalpinioideae (Leguminosae)
Source: PhytoKeys. 2022 Aug 22;205:3–58. doi: 10.3897/phytokeys.205.85866 (PMC9848904; doi:10.3897/phytokeys.205.85866)
Supplement: Supplementary material 2 — Table S2 [file phytokeys-205-003_article-85866__-s002.xlsx]

## Sheet: Morphology table
Taxon	Armature	Floral heteromorphy	Pod dehiscence
Arcoa gonavensis	Unarmed	-	-
Tetrapterocarpon geayi	Unarmed	-	-
Ceratonia siliqua	Unarmed	-	-
Acrocarpus fraxinifolius	Unarmed	-	-
Umtiza listeriana	Spinescent shoots	-	-
Gymnocladus dioicus	Unarmed	-	-
Gleditsia chinensis	Spinescent shoots	-	-
Cassia cowanii var. guianensis	Unarmed	-	-
Senna cushina	Unarmed	-	-
Senna leandrii	Unarmed	-	-
Senna mollissima	Unarmed	-	-
Senna rugosa	Unarmed	-	-
Senna lasseigniana	Unarmed	-	-
Senna velutina	Unarmed	-	-
Batesia floribunda	Unarmed	-	-
Recordoxylon speciosum	Unarmed	-	-
Melanoxylon brauna	Unarmed	-	-
Chamaecrista adiantifolia	Unarmed	-	-
Chamaecrista viscosa	Unarmed	-	-
Chamaecrista ramosa	Unarmed	-	-
Chamaecrista lineata	Unarmed	-	-
Cordeauxia edulis	Unarmed	-	-
Stuhlmannia moavi	Unarmed	-	-
Cenostigma pluviosum var. maraniona	Unarmed	-	-
Libidibia glabrata	Unarmed	-	-
Balsamocarpon brevifolium	Unarmed	-	-
Hoffmannseggia arequipensis	Unarmed	-	-
Zuccagnia punctata	Unarmed	-	-
Arquita trichocarpa	Unarmed	-	-
Pomaria jamesii	Unarmed	-	-
Erythrostemon mexicanus	Unarmed	-	-
Erythrostemon coluteifolius	Unarmed	-	-
Hererolandia pearsonii	Internodal prickles	-	-
Lophocarpinia aculeatifolia	Internodal prickles; spinescent shoots	-	-
Haematoxylum brasiletto	Internodal prickles; spinescent shoots	-	-
Caesalpinia cassioides	Internodal prickles; axillary thorns	-	-
Denisophytum madagascariense	Internodal prickles; axillary thorns	-	-
Paubrasilia echinata	Internodal prickles	-	-
Tara spinosa	Internodal prickles	-	-
Coulteria platyloba	Unarmed	-	-
Gelrebia rostrata	Internodal prickles	-	-
Guilandina bonduc	Internodal prickles; axillary thorns	-	-
Moullava spicata	Internodal prickles	-	-
Biancaea decapetala	Internodal prickles	-	-
Pterolobium stellatum	Internodal prickles; axillary thorns	-	-
Caesalpinia crista	Internodal prickles	-	-
Mezoneuron kauaiensis	Internodal prickles	-	-
Schizolobium parahyba	Unarmed	-	-
Bussea perrieri	Unarmed	-	-
Peltophorum dubium	Unarmed	-	-
Peltophorum africanum	Unarmed	-	-
Parkinsonia andicola	Axillary thorns	-	-
Heteroflorum sclerocarpum	Unarmed	-	-
Conzattia multiflora	Unarmed	-	-
Colvillea racemosa	Unarmed	-	-
Delonix decaryi	Unarmed	-	-
Delonix edule	Unarmed	-	-
Moldenhawera floribunda	Unarmed	-	-
Diptychandra aurantiaca	Unarmed	-	-
Arapatiella psilophylla	Unarmed	-	-
Jacqueshuberia brevipes	Unarmed	-	-
Tachigali guianensis	Unarmed	-	-
Tachigali bracteolata	Unarmed	-	-
Tachigali paniculata	Unarmed	-	-
Tachigali vasquezii	Unarmed	-	-
Tachigali odoratissima	Unarmed	-	-
Dimorphandra gardneriana	Unarmed	-	-
Dimorphandra macrostachya	Unarmed	-	-
Dimorphandra davisii	Unarmed	-	-
Mora gonggrijpii	Unarmed	-	-
Burkea africana	Unarmed	-	-
Stachyothyrsus staudtii	Unarmed	-	-
Dinizia jueirana-facao	Unarmed	-	-
Campsiandra comosa	Unarmed	-	-
Pachyelasma tessmannii	Unarmed	-	-
Erythrophleum ivorense	Unarmed	-	-
Erythrophleum teysmannii	Unarmed	-	-
Pentaclethra macroloba	Unarmed	Homomorphic	Explosively dehiscent
Pentaclethra macrophylla	Unarmed	Homomorphic	Explosively dehiscent
Tetrapleura tetraptera	Unarmed	Homomorphic	Indehiscent
Adenanthera pavonina	Unarmed	Homomorphic	Inertly dehiscent
Amblygonocarpus andongensis	Unarmed	Homomorphic	Indehiscent
Pseudoprosopis sericea	Unarmed	Homomorphic	Elastically dehiscent
Pseudoprosopis gilletii	Unarmed	Homomorphic	Elastically dehiscent
Pseudoprosopis euryphylla	Unarmed	Homomorphic	Elastically dehiscent
Xylia evansii	Unarmed	Homomorphic	Explosively dehiscent
Calpocalyx dinklagei	Unarmed	Homomorphic	Explosively dehiscent
Calpocalyx heitzii	Unarmed	Homomorphic	Explosively dehiscent
Xylia hoffmannii	Unarmed	Homomorphic	Explosively dehiscent
Xylia torreana	Unarmed	Homomorphic	Explosively dehiscent
Sympetalandra unijuga	Unarmed	Homomorphic	Inertly dehiscent
Sympetalandra schmutzii	Unarmed	Homomorphic	Inertly dehiscent
Chidlowia sanguinea	Unarmed	Homomorphic	Explosively dehiscent
Aubrevillea kerstingii	Unarmed	Homomorphic	Indehiscent
Piptadeniastrum africanum	Unarmed	Homomorphic	Inertly dehiscent
Entada pervillei	Unarmed	Homomorphic	Craspedium
Entada rheedei	Unarmed	Homomorphic	Craspedium
Entada sp.	Unarmed	Unknown	Unknown
Entada polystachya	Unarmed	Homomorphic	Craspedium
Entada tuberosa	Unarmed	Homomorphic	Craspedium
Entada africana	Unarmed	Homomorphic	Craspedium
Entada arenaria	Unarmed	Homomorphic	Craspedium
Elephantorrhiza elephantina	Unarmed	Homomorphic	Craspedium
Elephantorrhiza burkei	Unarmed	Homomorphic	Craspedium
Prosopis africana	Unarmed	Homomorphic	Indehiscent
Plathymenia reticulata	Unarmed	Homomorphic	Inertly dehiscent
Fillaeopsis discophora	Unarmed	Homomorphic	Inertly dehiscent
Newtonia hildebrandtii	Unarmed	Homomorphic	Inertly dehiscent
Cylicodiscus gabunensis	Internodal prickles	Homomorphic	Inertly dehiscent
Indopiptadenia oudhensis	Internodal prickles	Homomorphic	Inertly dehiscent
Prosopis cineraria	Internodal prickles	Homomorphic	Indehiscent
Prosopis farcta	Internodal prickles	Homomorphic	Indehiscent
Xerocladia viridiramis	Stipular spines	Homomorphic	Indehiscent
Prosopis ferox	Stipular spines	Homomorphic	Indehiscent
Prosopis strombulifera	Stipular spines	Homomorphic	Indehiscent
Prosopis argentina	Axillary thorns	Homomorphic	Indehiscent
Prosopis kuntzei	Spinescent shoots	Homomorphic	Indehiscent
Prosopis juliflora	Axillary thorns	Homomorphic	Indehiscent
Prosopis laevigata	Axillary thorns	Homomorphic	Indehiscent
Prosopis ruscifolia	Axillary thorns	Homomorphic	Indehiscent
Neptunia oleracea	Unarmed	Heteromorphic 1	Inertly dehiscent
Lemurodendron capuronii	Unarmed	Heteromorphic 1	Inertly dehiscent
Leucaena trichandra	Unarmed	Homomorphic	Inertly dehiscent
Schleinitzia megaladenia	Unarmed	Homomorphic	Indehiscent
Schleinitzia novoguineensis	Unarmed	Homomorphic	Indehiscent
Schleinitzia insularum	Unarmed	Homomorphic	Indehiscent
Desmanthus balsensis	Unarmed	Homomorphic	Elastically dehiscent
Kanaloa kahoolawensis	Unarmed	Homomorphic	Inertly dehiscent
Desmanthus leptophyllus	Unarmed	Homomorphic	Inertly dehiscent
Desmanthus virgatus	Unarmed	Heteromorphic 1	Inertly dehiscent
Desmanthus acuminatus	Unarmed	Heteromorphic 1	Inertly dehiscent
Mimozyganthus carinatus	Stipular spines	Homomorphic	Indehiscent
Piptadeniopsis lomentifera	Stipular spines	Homomorphic	Loment
Prosopidastrum globosum	Stipular spines	Homomorphic	Loment
Calliandropsis nervosa	Unarmed	Homomorphic	Elastically dehiscent
Dichrostachys cinerea	Spinescent shoots	Heteromorphic 1	Indehiscent
Dichrostachys myriophylla	Unarmed	Heteromorphic 1	Elastically dehiscent
Gagnebina commersoniana	Unarmed	Heteromorphic 1	Indehiscent
Dichrostachys paucifoliolata	Unarmed	Heteromorphic 1	Elastically dehiscent
Alantsilodendron glomeratum	Unarmed	Homomorphic	Unknown
Dichrostachys unijuga	Unarmed	Heteromorphic 1	Elastically dehiscent
Dichrostachys tenuifolia	Unarmed	Heteromorphic 1	Elastically dehiscent
Alantsilodendron villosum	Unarmed	Homomorphic	Elastically dehiscent
Dichrostachys richardiana	Unarmed	Heteromorphic 1	Elastically dehiscent
Alantsilodendron pilosum	Unarmed	Homomorphic	Elastically dehiscent
Vachellia tortilis	Stipular spines	Homomorphic	Indehiscent
Vachellia erioloba	Stipular spines	Homomorphic	Indehiscent
Vachellia viguieri	Stipular spines	Homomorphic	Inertly dehiscent
Vachellia nilotica	Stipular spines	Homomorphic	Indehiscent
Vachellia farnesiana	Stipular spines	Homomorphic	Indehiscent
Anadenanthera colubrina	Unarmed	Homomorphic	Inertly dehiscent
Parkia ulei	Unarmed	Homomorphic	Inertly dehiscent
Parkia panurensis	Unarmed	Heteromorphic 1	Indehiscent
Parkia igneiflora	Unarmed	Heteromorphic 1	Indehiscent
Parkia pendula	Unarmed	Heteromorphic 1	Inertly dehiscent
Parkia bahiae	Unarmed	Heteromorphic 1	Indehiscent
Parkia timoriana	Unarmed	Heteromorphic 1	Indehiscent
Parkia bicolor	Unarmed	Heteromorphic 1	Indehiscent
Lachesiodendron viridiflorum	Stipular spines	Homomorphic	Inertly dehiscent
Stryphnodendron paniculatum	Unarmed	Homomorphic	Indehiscent
Stryphnodendron adstringens	Unarmed	Homomorphic	Indehiscent
Stryphnodendron pulcherrimum	Unarmed	Homomorphic	Indehiscent
Pseudopiptadenia psilostachya	Unarmed	Homomorphic	Inertly dehiscent
Pseudopiptadenia contorta	Unarmed	Homomorphic	Inertly dehiscent
Stryphnodendron duckeanum	Unarmed	Homomorphic	Inertly dehiscent
Pityrocarpa moniliformis	Unarmed	Homomorphic	Inertly dehiscent
Pseudopiptadenia schumanniana	Unarmed	Homomorphic	Inertly dehiscent
Parapiptadenia zehntneri	Unarmed	Homomorphic	Inertly dehiscent
Parapiptadenia excelsa	Unarmed	Homomorphic	Inertly dehiscent
Piptadenia uaupensis	Internodal prickles	Homomorphic	Inertly dehiscent
Piptadenia robusta	Internodal prickles	Homomorphic	Inertly dehiscent
Piptadenia buchtienii	Internodal prickles	Homomorphic	Inertly dehiscent
Adenopodia scelerata	Internodal prickles	Homomorphic	Craspedium
Adenopodia patens	Internodal prickles	Homomorphic	Craspedium
Mimosa myriadenia	Internodal prickles	Homomorphic	Craspedium
Mimosa revoluta	Nodal prickles	Homomorphic	Craspedium
Mimosa hondurana	Internodal prickles	Homomorphic	Craspedium
Mimosa hexandra	Internodal prickles; nodal prickles	Homomorphic	Craspedium or loment
Mimosa tenuiflora	Internodal prickles	Homomorphic	Craspedium
Mimosa ceratonia	Internodal prickles	Homomorphic	Craspedium
Mimosa grandidieri	Nodal prickles	Homomorphic	Craspedium
Mimosa rubicaulis subsp. himalayana	Internodal prickles	Homomorphic	Craspedium
Mimosa invisa	Internodal prickles	Homomorphic	Craspedium
Mimosa speciosissima	Unarmed	Homomorphic	Craspedium
Mimosa pigra	Internodal prickles	Homomorphic	Craspedium
Mimosa pudica	Internodal prickles; nodal prickles	Homomorphic	Craspedium
Mimosa tequilana	Nodal prickles	Homomorphic	Craspedium
Mimosa tricephala	Nodal prickles	Homomorphic	Craspedium
Mimosa dolens	Internodal prickles; nodal prickles	Homomorphic	Craspedium
Senegalia ataxacantha	Nodal prickles	Homomorphic	Inertly dehiscent
Senegalia nigrescens	Nodal prickles	Homomorphic	Inertly dehiscent
Parasenegalia visco	Unarmed	Homomorphic	Inertly dehiscent
Mariosousa sericea	Unarmed	Homomorphic	Inertly dehiscent
Pseudosenegalia feddeana	Unarmed	Homomorphic	Inertly dehiscent
Albizia leonardii	Unarmed	Homomorphic	Inertly dehiscent
Senegalia bahiensis	Internodal prickles	Homomorphic	Inertly dehiscent
Senegalia sakalava	Internodal prickles	Homomorphic	Inertly dehiscent
Senegalia pentagona	Internodal prickles	Homomorphic	Inertly dehiscent
Senegalia borneensis	Internodal prickles	Homomorphic	Inertly dehiscent
Acaciella villosa	Unarmed	Homomorphic	Inertly dehiscent
Afrocalliandra gilbertii	Spinescent shoots	Homomorphic	Elastically dehiscent
Afrocalliandra redacta	Stipular spines	Homomorphic	Elastically dehiscent
Calliandra hygrophila	Unarmed	Homomorphic	Elastically dehiscent
Calliandra viscidula	Unarmed	Homomorphic	Elastically dehiscent
Calliandra haematomma	Unarmed	Homomorphic	Elastically dehiscent
Calliandra parviflora	Unarmed	Homomorphic	Elastically dehiscent
Calliandra haematocephala	Unarmed	Homomorphic	Elastically dehiscent
Calliandra bella	Unarmed	Homomorphic	Elastically dehiscent
Calliandra sessilis	Unarmed	Heteromorphic 2	Unknown
Zapoteca nervosa	Unarmed	Homomorphic	Elastically dehiscent
Zapoteca amazonica	Unarmed	Homomorphic	Elastically dehiscent
Zapoteca caracasana	Unarmed	Homomorphic	Elastically dehiscent
Zapoteca aculeata	Stipular spines	Homomorphic	Elastically dehiscent
Viguieranthus glaber	Unarmed	Homomorphic	Elastically dehiscent
Faidherbia albida	Stipular spines	Homomorphic	Indehiscent
Sanjappa cynometroides	Stipular spines	Homomorphic	Elastically dehiscent
Calliandra sp. nov.	Stipular spines	Homomorphic	Elastically dehiscent
Thailentadopsis tenuis	Stipular spines	Homomorphic	Indehiscent
Thailentadopsis nitida	Stipular spines	Homomorphic	Indehiscent
Hesperalbizzia occidentalis	Unarmed	Homomorphic	Inertly dehiscent
Lysiloma latisiliquum	Unarmed	Homomorphic	Indehiscent
Lysiloma candidum	Unarmed	Homomorphic	Craspedium
Cojoba rufescens	Unarmed	Homomorphic	Inertly dehiscent
Cojoba arborea	Unarmed	Homomorphic	Inertly dehiscent
Cojoba filipes	Unarmed	Homomorphic	Inertly dehiscent
Cojoba zanonii	Unarmed	Homomorphic	Inertly dehiscent
Havardia campylacantha	Stipular spines	Homomorphic	Inertly dehiscent
Sphinga acatlensis	Stipular spines	Homomorphic	Inertly dehiscent
Painteria leptophylla	Stipular spines	Homomorphic	Inertly dehiscent
Painteria elachistophylla	Stipular spines	Homomorphic	Inertly dehiscent
Ebenopsis confinis	Stipular spines	Homomorphic	Inertly dehiscent
Havardia pallens	Stipular spines	Homomorphic	Inertly dehiscent
Pithecellobium keyense	Unarmed	Homomorphic	Inertly dehiscent
Pithecellobium dulce	Stipular spines	Homomorphic	Inertly dehiscent
Pithecellobium excelsum	Stipular spines	Homomorphic	Inertly dehiscent
Pithecellobium macrandrium	Stipular spines	Homomorphic	Inertly dehiscent
Pithecellobium hymenaeifolium	Stipular spines	Homomorphic	Inertly dehiscent
Wallaceodendron celebicum	Unarmed	Homomorphic	Inertly dehiscent
Falcataria moluccana	Unarmed	Homomorphic	Inertly dehiscent
Serianthes nelsonii	Unarmed	Homomorphic	Indehiscent
Serianthes calycina	Unarmed	Homomorphic	Indehiscent
Archidendropsis granulosa	Unarmed	Homomorphic	Inertly dehiscent
Pararchidendron pruinosum	Unarmed	Homomorphic	Inertly dehiscent
Archidendron ptenopum	Unarmed	Homomorphic	Unknown
Archidendron kanisii	Unarmed	Homomorphic	Inertly dehiscent
Archidendron grandiflorum	Unarmed	Homomorphic	Inertly dehiscent
Archidendron lucidum	Unarmed	Homomorphic	Inertly dehiscent
Archidendron triplinervium	Unarmed	Homomorphic	Inertly dehiscent
Archidendron ellipticum subsp. ellipticum	Unarmed	Homomorphic	Inertly dehiscent
Archidendron clypearia	Unarmed	Homomorphic	Inertly dehiscent
Archidendron quocense	Unarmed	Homomorphic	Inertly dehiscent
Archidendron jiringa	Unarmed	Homomorphic	Inertly dehiscent
Archidendron bubalinum	Unarmed	Homomorphic	Inertly dehiscent
Archidendropsis xanthoxylon	Unarmed	Homomorphic	Inertly dehiscent
Paraserianthes lophantha subsp. lophantha	Unarmed	Homomorphic	Inertly dehiscent
Acacia alata var. biglandulosa	Stipular spines	Homomorphic	Inertly dehiscent
Acacia lycopodiifolia	Unarmed	Homomorphic	Inertly dehiscent
Acacia rostellifera	Unarmed	Homomorphic	Inertly dehiscent
Acacia ampliceps	Unarmed	Homomorphic	Inertly dehiscent
Acacia victoriae	Stipular spines	Homomorphic	Inertly dehiscent
Acacia pyrifolia	Stipular spines	Homomorphic	Inertly dehiscent
Acacia murrayana	Unarmed	Homomorphic	Inertly dehiscent
Acacia platycarpa	Unarmed	Homomorphic	Inertly dehiscent
Acacia deanei subsp. paucijuga	Unarmed	Homomorphic	Inertly dehiscent
Acacia pycnantha	Unarmed	Homomorphic	Inertly dehiscent
Acacia oswaldii	Unarmed	Homomorphic	Inertly dehiscent
Acacia montana	Unarmed	Homomorphic	Inertly dehiscent
Acacia verniciflua	Unarmed	Homomorphic	Inertly dehiscent
Acacia ausfeldii	Unarmed	Homomorphic	Inertly dehiscent
Acacia longifolia	Unarmed	Homomorphic	Inertly dehiscent
Acacia triptera	Unarmed	Homomorphic	Inertly dehiscent
Acacia auriculiformis	Unarmed	Homomorphic	Inertly dehiscent
Acacia colei var. colei	Unarmed	Homomorphic	Inertly dehiscent
Acacia tumida	Unarmed	Homomorphic	Inertly dehiscent
Acacia sibirica	Unarmed	Homomorphic	Inertly dehiscent
Cedrelinga cateniformis	Unarmed	Homomorphic	Loment
Albizia carbonaria	Unarmed	Heteromorphic 2	Indehiscent
Pseudosamanea cubana	Unarmed	Heteromorphic 2	Indehiscent
Pseudosamanea guachapele	Unarmed	Heteromorphic 2	Inertly dehiscent
Albizia edwallii	Unarmed	Heteromorphic 2	Inertly dehiscent
Albizia coripatensis	Unarmed	Heteromorphic 2	Inertly dehiscent
Albizia burkartiana	Unarmed	Heteromorphic 2	Inertly dehiscent
Albizia berteroana	Unarmed	Heteromorphic 2	Indehiscent
Albizia xerophytica	Unarmed	Heteromorphic 2	Inertly dehiscent
Albizia adinocephala	Unarmed	Heteromorphic 2	Inertly dehiscent
Albizia tomentosa	Unarmed	Heteromorphic 2	Inertly dehiscent
Albizia sinaloensis	Unarmed	Heteromorphic 2	Inertly dehiscent
Albizia niopoides	Unarmed	Heteromorphic 2	Inertly dehiscent
Albizia decandra	Unarmed	Heteromorphic 2	Indehiscent
Albizia multiflora	Unarmed	Heteromorphic 2	Indehiscent
Albizia glabripetala	Unarmed	Heteromorphic 2	Loment
Albizia inundata	Unarmed	Heteromorphic 2	Loment
Albizia subdimidiata var. minor	Unarmed	Heteromorphic 2	Loment
Albizia subdimidiata var. subdimidiata	Unarmed	Heteromorphic 2	Loment
Punjuba callejasii	Unarmed	Homomorphic	Inertly dehiscent
Punjuba racemiflora	Unarmed	Homomorphic	Inertly dehiscent
Punjuba lehmannii	Unarmed	Homomorphic	Inertly dehiscent
Punjuba killipii	Unarmed	Homomorphic	Inertly dehiscent
Jupunba macradenia	Unarmed	Heteromorphic 2	Inertly dehiscent
Balizia leucocalyx	Unarmed	Heteromorphic 2	Indehiscent
Balizia pedicellaris	Unarmed	Heteromorphic 2	Inertly dehiscent
Balizia elegans	Unarmed	Heteromorphic 2	Unknown
Balizia sp. nov.	Unarmed	Heteromorphic 2	Loment
Albizia obliquifoliolata	Unarmed	Heteromorphic 2	Loment
Albizia rhombifolia	Unarmed	Heteromorphic 2	Loment
Hydrochorea gonggrijpii	Unarmed	Heteromorphic 2	Loment
Hydrochorea marginata	Unarmed	Heteromorphic 2	Loment
Hydrochorea corymbosa	Unarmed	Heteromorphic 2	Loment
Jupunba langsdorffii	Unarmed	Heteromorphic 2	Inertly dehiscent
Jupunba oxyphyllidia	Unarmed	Heteromorphic 2	Unknown
Jupunba idiopoda	Unarmed	Heteromorphic 2	Inertly dehiscent
Jupunba nipensis	Unarmed	Homomorphic	Inertly dehiscent
Jupunba aspleniifolia	Unarmed	Homomorphic	Inertly dehiscent
Jupunba abbottii	Unarmed	Heteromorphic 2	Inertly dehiscent
Jupunba oppositifolia	Unarmed	Homomorphic	Inertly dehiscent
Jupunba laeta	Unarmed	Heteromorphic 2	Inertly dehiscent
Jupunba cochleata	Unarmed	Heteromorphic 2	Inertly dehiscent
Jupunba filamentosa	Unarmed	Heteromorphic 2	Inertly dehiscent
Jupunba rhombea	Unarmed	Heteromorphic 2	Inertly dehiscent
Jupunba villosa	Unarmed	Heteromorphic 2	Inertly dehiscent
Jupunba brachystachya	Unarmed	Heteromorphic 2	Inertly dehiscent
Jupunba trapezifolia var. micradenia	Unarmed	Heteromorphic 2	Inertly dehiscent
Jupunba barbouriana	Unarmed	Heteromorphic 2	Inertly dehiscent
Jupunba commutata	Unarmed	Heteromorphic 2	Inertly dehiscent
Jupunba microcalyx	Unarmed	Heteromorphic 2	Inertly dehiscent
Jupunba leucophylla	Unarmed	Heteromorphic 2	Inertly dehiscent
Jupunba floribunda	Unarmed	Heteromorphic 2	Inertly dehiscent
Jupunba longipedunculata	Unarmed	Heteromorphic 2	Inertly dehiscent
Samanea saman	Unarmed	Heteromorphic 2	Indehiscent
Chloroleucon mangense var. mangense	Axillary thorns	Heteromorphic 2	Inertly dehiscent
Chloroleucon tenuiflorum	Axillary thorns	Homomorphic	Inertly dehiscent
Leucochloron bolivianum	Unarmed	Homomorphic	Inertly dehiscent
Enterolobium contortisiliquum	Unarmed	Homomorphic	Indehiscent
Enterolobium cyclocarpum	Unarmed	Homomorphic	Indehiscent
Enterolobium barinense	Unarmed	Heteromorphic 2	Indehiscent
Enterolobium barnebianum	Unarmed	Heteromorphic 2	Indehiscent
Enterolobium maximum	Unarmed	Homomorphic	Indehiscent
Enterolobium gummiferum	Unarmed	Homomorphic	Indehiscent
Albizia umbellata	Stipular spines; axillary thorns	Heteromorphic 2	Loment
Albizia umbellata subsp. umbellata	Stipular spines; axillary thorns	Heteromorphic 2	Loment
Albizia saponaria	Unarmed	Heteromorphic 2	Inertly dehiscent
Albizia retusa	Unarmed	Heteromorphic 2	Indehiscent
Albizia adianthifolia	Unarmed	Heteromorphic 2	Inertly dehiscent
Albizia zygia	Unarmed	Heteromorphic 2	Inertly dehiscent
Albizia grandibracteata	Unarmed	Heteromorphic 2	Inertly dehiscent
Albizia ferruginea	Unarmed	Heteromorphic 2	Inertly dehiscent
Albizia versicolor	Unarmed	Heteromorphic 2	Inertly dehiscent
Albizia brevifolia	Unarmed	Heteromorphic 2	Inertly dehiscent
Albizia anthelmintica	Spinescent shoots	Heteromorphic 2	Inertly dehiscent
Albizia viridis	Unarmed	Heteromorphic 2	Indehiscent
Albizia atakataka	Unarmed	Heteromorphic 2	Loment
Albizia polyphylla	Unarmed	Heteromorphic 2	Indehiscent
Albizia mahalao	Unarmed	Heteromorphic 2	Indehiscent
Albizia bernieri	Unarmed	Heteromorphic 2	Indehiscent
Albizia boivinii	Unarmed	Heteromorphic 2	Indehiscent
Albizia obbiadensis	Unarmed	Unknown	Indehiscent
Albizia aurisparsa	Unarmed	Heteromorphic 2	Indehiscent
Albizia sahafariensis	Unarmed	Unknown	Indehiscent
Albizia masikororum	Unarmed	Heteromorphic 2	Indehiscent
Blanchetiodendron blanchetii	Unarmed	Heteromorphic 2	Inertly dehiscent
Leucochloron limae	Unarmed	Homomorphic	Inertly dehiscent
Abarema diamantina	Unarmed	Homomorphic	Inertly dehiscent
Abarema cochliacarpos	Unarmed	Homomorphic	Inertly dehiscent
Robrichia oldemanii	Unarmed	Heteromorphic 2	Indehiscent
Robrichia schomburgkii	Unarmed	Heteromorphic 2	Indehiscent
Albizia dinklagei	Unarmed	Heteromorphic 2	Indehiscent
Albizia altissima	Unarmed	Heteromorphic 2	Loment
Albizia leptophylla	Unarmed	Heteromorphic 2	Loment
Albizia eriorhachis	Unarmed	Heteromorphic 2	Loment
Zygia inundata	Unarmed	Homomorphic	Inertly dehiscent
Zygia sabatieri	Unarmed	Homomorphic	Inertly dehiscent
Inga huberi	Unarmed	Homomorphic	Indehiscent
Inga tenuistipula	Unarmed	Homomorphic	Indehiscent
Inga stipularis	Unarmed	Homomorphic	Indehiscent
Inga heterophylla	Unarmed	Homomorphic	Indehiscent
Inga brevipes	Unarmed	Homomorphic	Indehiscent
Inga umbellifera	Unarmed	Homomorphic	Indehiscent
Inga alba	Unarmed	Homomorphic	Indehiscent
Inga laurina	Unarmed	Homomorphic	Indehiscent
Inga cinnamomea	Unarmed	Homomorphic	Indehiscent
Inga longiflora	Unarmed	Homomorphic	Indehiscent
Inga punctata	Unarmed	Homomorphic	Indehiscent
Inga leiocalycina	Unarmed	Homomorphic	Indehiscent
Inga setosa	Unarmed	Homomorphic	Indehiscent
Inga sapindoides	Unarmed	Homomorphic	Indehiscent
Inga edulis	Unarmed	Homomorphic	Indehiscent
Inga thibaudiana	Unarmed	Homomorphic	Indehiscent
Inga ruiziana	Unarmed	Homomorphic	Indehiscent
Inga alata	Unarmed	Homomorphic	Indehiscent
Inga pezizifera	Unarmed	Homomorphic	Indehiscent
Inga marginata	Unarmed	Homomorphic	Indehiscent
Inga bourgonii	Unarmed	Homomorphic	Indehiscent
Inga nouragensis	Unarmed	Homomorphic	Indehiscent
Inga cylindrica	Unarmed	Homomorphic	Indehiscent
Inga auristellae	Unarmed	Homomorphic	Indehiscent
Zygia ocumarensis	Unarmed	Homomorphic	Inertly dehiscent
Macrosamanea kegelii	Unarmed	Homomorphic	Unknown
Macrosamanea spruceana	Unarmed	Homomorphic	Inertly dehiscent
Macrosamanea duckei	Unarmed	Homomorphic	Inertly dehiscent
Macrosamanea amplissima	Unarmed	Homomorphic	Inertly dehiscent
Macrosamanea prancei	Unarmed	Homomorphic	Unknown
Macrosamanea discolor	Unarmed	Homomorphic	Unknown
Macrosamanea simabifolia	Unarmed	Homomorphic	Inertly dehiscent
Zygia claviflora	Unarmed	Homomorphic	Inertly dehiscent
Zygia racemosa	Unarmed	Homomorphic	Inertly dehiscent
Zygia basijuga	Unarmed	Homomorphic	Inertly dehiscent
Zygia bisingula	Unarmed	Homomorphic	Inertly dehiscent
Zygia ramiflora	Unarmed	Homomorphic	Inertly dehiscent
Zygia inaequalis	Unarmed	Homomorphic	Inertly dehiscent
Zygia conzattii	Unarmed	Homomorphic	Inertly dehiscent
Zygia unifoliolata	Unarmed	Homomorphic	Inertly dehiscent
Zygia rhytidocarpa	Unarmed	Homomorphic	Inertly dehiscent
Zygia latifolia var. communis	Unarmed	Homomorphic	Inertly dehiscent
Zygia ampla	Unarmed	Homomorphic	Inertly dehiscent
Zygia longifolia	Unarmed	Homomorphic	Inertly dehiscent
Zygia cataractae	Unarmed	Homomorphic	Inertly dehiscent
Zygia morongii	Unarmed	Homomorphic	Inertly dehiscent
Zygia obolingoides	Unarmed	Homomorphic	Unknown
Zygia sp.	Unarmed	Unknown	Unknown
